# Supplementary material for: Membrane adhesion and the formation of heterogeneities: biology, biophysics, and biotechnology
Source: Royal Society of Chemistry journal article supplement (doi:10.1039/c4cp05876c), 2015-01-01
Supplement: c4cp05876c1.pdf [file c4cp05876c1.pdf]

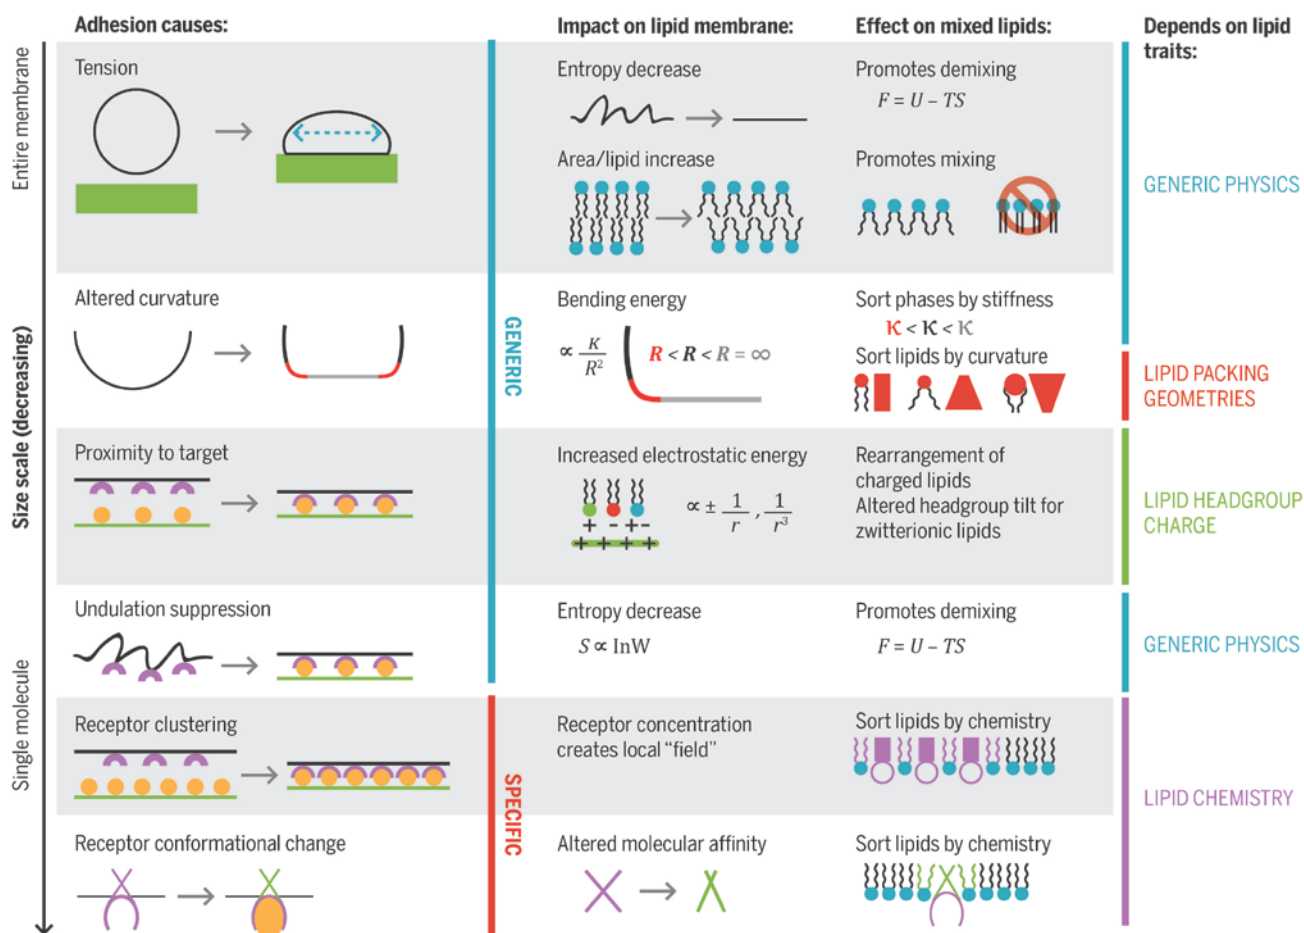

**Supplementary Figure S1.** This figure consolidates the most salient points of the information presented in Figures 1-3 of the main text.
